# Supplementary material for: Stoichiometric reaction and catalytic effect of 2-dimethylaminoethanol in urethane formation
Source: Royal Society of Chemistry journal article supplement (doi:10.1039/d3cp05800j), 2024-01-01
Supplement: d3cp05800j1.pdf [file d3cp05800j1.pdf]

Supplementary Information

# Stoichiometric reaction and catalytic effect of 2-dimethylaminoethanol in urethane formation

Hadeer Q. Waleed <sup>a,b</sup>, Rachid Hadjadj<sup>a,b</sup>, Béla Viskolcz<sup>a,b</sup>, and Béla Fiser <sup>b,c,d,\*</sup>

<sup>a</sup> Institute of Chemistry, University of Miskolc, 3515 Miskolc-Egyetemváros, Hungary;

<sup>b</sup> Higher Education and Industrial Cooperation Centre, University of Miskolc, 3515 Miskolc-Egyetemváros, Hungary

<sup>c</sup> Ferenc Rakoczi II Transcarpathian Hungarian College of Higher Education, 90200 Beregszász, Transcarpathia, Ukraine

<sup>d</sup> Department of Physical Chemistry, Faculty of Chemistry, University of Lodz, Lodz 90-236, Poland

\* Correspondence: bela.fiser@uni-miskolc.hu (B.F.)

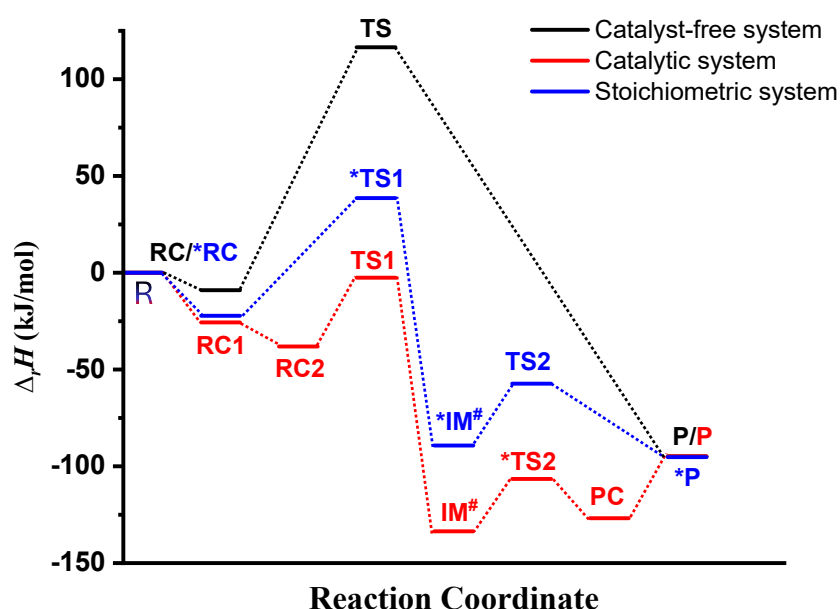

**Figure S1.** Relative enthalpy ( $\Delta_r H$ ) profiles of the catalyst-free, catalytic, and stoichiometric urethane formation reactions, where the latter two involves 2-dimethylaminoethanol (DMEA) as catalyst or reactant as follows: phenyl isocyanate (PhNCO)-butan-1-ol (BuOH) (catalyst-free system) - black line; PhNCO-BuOH and DMEA (catalyst) - red line; PhNCO-DMEA (stoichiometric reaction) - blue line. The energies were calculated at the G3PMP2BHandHLYP level of theory at (298.15 K and 1 atm) in acetonitrile using the SMD implicit solvent model. #Corrected relative enthalpies of IM calculated according to Ref.47,48.

**Table S1.** Zero-point corrected relative energies ( $\Delta_r E_0$ ), enthalpies ( $\Delta_r H$ ), relative Gibbs free energies ( $\Delta_r G$ ), and entropies ( $\Delta_r S$ ) of the reaction between phenyl isocyanate and butan-1-ol in the presence 2-dimethylaminoethanol (DMEA) (catalytic system), and reaction between 2-dimethylaminoethanol (DMEA) and phenyl isocyanate (PhNCO) (stoichiometric), calculated at the BHandHLYP/6-31G(d) level of theory in acetonitrile using the SMD implicit solvent model at 298.15 K and 1 atm. R—reactant; RC—reactant complex; TS—transition state; IM—intermediate; PC—product complex; P—product.

|                              | $\Delta_r E_0$ (kJ/mol) |         |         |        |         |         |         |          |
|------------------------------|-------------------------|---------|---------|--------|---------|---------|---------|----------|
|                              | R                       | RC1     | RC2     | TS1    | IM      | TS2     | PC      | P        |
| <b>Catalyst-free system</b>  | 0.0                     | -       | -10.48' | 122.75 | -       | -       | -       | -120.94  |
| <b>Catalytic system</b>      | 0.0                     | -25.35  | -37.91  | 13.59  | -86.98  | -96.11  | -138.33 | -120.94  |
| <b>Stoichiometric system</b> | 0.0                     | *-17.68 | -       | *44.49 | *-46.78 | *-52.21 | -       | *-118.02 |
|                              | $\Delta_r H$ (kJ/mol)   |         |         |        |         |         |         |          |
|                              | R                       | RC1     | RC2     | TS1    | IM      | TS2     | PC      | P        |
| <b>Catalyst-free system</b>  | 0.00                    | -       | -8.23'  | 120.13 | -       | -       | -       | -123.20  |

|                                            |          |            |            |            |                                |            |           |          |
|--------------------------------------------|----------|------------|------------|------------|--------------------------------|------------|-----------|----------|
| <b>Catalytic system</b>                    | 0.0      | -24.04     | -33.85     | 13.04      | -88.21 (-126.31 <sup>#</sup> ) | -98.45     | -138.50   | -123.20  |
| <b>Stoichiometric system</b>               | 0.0      | *-15.89    | -          | *40.03     | *-51.44 (-89.54 <sup>#</sup> ) | *-57.40    | -         | *-121.32 |
| <b><math>\Delta_r G</math> (kJ/mol)</b>    |          |            |            |            |                                |            |           |          |
|                                            | <b>R</b> | <b>RC1</b> | <b>RC2</b> | <b>TS1</b> | <b>IM</b>                      | <b>TS2</b> | <b>PC</b> | <b>P</b> |
| <b>Catalyst-free system</b>                | 0.0      | -          | 29.65'     | 173.69     | -                              | -          | -         | -69.89   |
| <b>Catalytic system</b>                    | 0.0      | 16.44      | 49.00      | 111.31     | 15.66 (-9.24 <sup>#</sup> )    | 8.69       | -41.55    | -69.89   |
| <b>Stoichiometric system</b>               | 0.0      | *24.04     | -          | *100.13    | *12.68 (-12.22 <sup>#</sup> )  | *7.88      | -         | *-64.77  |
| <b><math>\Delta_r S</math> (Cal/mol*K)</b> |          |            |            |            |                                |            |           |          |
|                                            | <b>R</b> | <b>RC1</b> | <b>RC2</b> | <b>TS1</b> | <b>IM</b>                      | <b>TS2</b> | <b>PC</b> | <b>P</b> |
| <b>Catalyst-free system</b>                | 0.0      | -          | -30.4'     | -97.3      | -                              | -          | -         | -42.73   |
| <b>Catalytic system</b>                    | 0.0      | -32.45     | -66.42     | -78.78     | -83.28                         | -85.89     | -77.72    | -42.73   |
| <b>Stoichiometric system</b>               | 0.0      | *-32.01    | -          | *48.18     | *51.40                         | *-52.34    | -         | *-45.33  |

' RC for catalysts-free reaction. \* pathway for stoichiometric reaction. # Corrected values calculated according to ref. 47,48.

**Table S2.** Zero-point corrected relative energies ( $\Delta_r E_0$ ), enthalpies ( $\Delta_r H$ ), and entropies ( $\Delta_r S$ ) of the reaction between phenyl isocyanate (PhNCO) and butan-1-ol in the presence 2-dimethylaminoethanol (DMEA) (catalytic system), and DMEA with PhNCO (stoichiometric system), calculated at the G3MP2BHandHLYP level of theory at (298.15 K and 1 atm) in acetonitrile using the SMD implicit solvent model. R—reactant; RC—reactant complex; TS—transition state; IM—intermediate; PC—product complex; P—product.

|                                            |          |            |            |            |                                |            |           |          |
|--------------------------------------------|----------|------------|------------|------------|--------------------------------|------------|-----------|----------|
| <b><math>\Delta_r E_0</math> (kJ/mol)</b>  |          |            |            |            |                                |            |           |          |
|                                            | <b>R</b> | <b>RC1</b> | <b>RC2</b> | <b>TS1</b> | <b>IM</b>                      | <b>TS2</b> | <b>PC</b> | <b>P</b> |
| <b>Catalyst-free system</b>                | 0.0      | -          | -11.22'    | 119.11     | -                              | -          | -         | -92.58   |
| <b>Catalytic system</b>                    | 0.0      | -26.96     | -42.13     | -2.00      | -94.27                         | -104.16    | -126.62   | -92.58   |
| <b>Stoichiometric system</b>               | 0.0      | *-23.98    | -          | *43.09     | *-46.53                        | *-52.07    | -         | *-91.93  |
| <b><math>\Delta_r H</math> (kJ/mol)</b>    |          |            |            |            |                                |            |           |          |
|                                            | <b>R</b> | <b>RC1</b> | <b>RC2</b> | <b>TS1</b> | <b>IM</b>                      | <b>TS2</b> | <b>PC</b> | <b>P</b> |
| <b>Catalyst-free system</b>                | 0.0      | -          | -8.97'     | 116.49     | -                              | -          | -         | -94.84   |
| <b>Catalytic system</b>                    | 0.0      | -25.66     | -38.08     | -2.56      | -95.51 (-133.61 <sup>#</sup> ) | -106.51    | -126.79   | -94.84   |
| <b>Stoichiometric system</b>               | 0.0      | *-22.19    | -          | *38.63     | *-51.19 (-89.29 <sup>#</sup> ) | *-57.27    | -         | *-95.23  |
| <b><math>\Delta_r S</math> (Cal/mol*K)</b> |          |            |            |            |                                |            |           |          |
|                                            | <b>R</b> | <b>RC1</b> | <b>RC2</b> | <b>TS1</b> | <b>IM</b>                      | <b>TS2</b> | <b>PC</b> | <b>P</b> |
| <b>Catalyst-free system</b>                | -        | -          | -30.36'    | -42.94     | -                              | -          | -         | -42.73   |
| <b>Catalytic system</b>                    | 0.0      | -32.45     | -66.42     | -78.78     | -83.28                         | -85.89     | -77.72    | -42.73   |
| <b>Stoichiometric system</b>               | 0.0      | *-32.01    | -          | *-101.64   | *-141.43                       | *-122.97   | -         | *-111.81 |

' RC for catalysts-free reaction. \* pathway for stoichiometric reaction. # Corrected values calculated according to ref. 47,48..

**Table S3.** Cartesian coordinates of the stationary points for the studied species. The structures calculated at the BHandHLYP/6-31G(d) level of theory in acetonitrile at 298.15 K and 1 atm. Cat.- catalysts, RC – reactant complex, TS – transition state, IM – intermediate, PC – product complex, P – product. \* Pathway for autocatalysis.

**Keywords included in the input files to carry out the calculations on the studied structures:**

```
# bhandhlyp/6-31g(d) opt=(tight) freq scrf=(smd,solvent=acetonitrile)
# bhandhlyp/6-31g(d) opt=(calcfc,tight,ts,noeigentest) freq scrf=(smd,solvent=acetonitrile)
# MP2/GTMP2large scrf=(smd,solvent=acetonitrile)
# QCISD(T)/6-31G(d) scrf=(smd,solvent=acetonitrile)
```

|             |                   |                    |                    |                 |                    |                               |
|-------------|-------------------|--------------------|--------------------|-----------------|--------------------|-------------------------------|
| <b>DMEA</b> |                   |                    |                    | <b>DMEA-RC1</b> |                    |                               |
| <b>N</b>    | <b>0.98199200</b> | <b>-0.00776600</b> | <b>-0.32318300</b> | <b>N</b>        | <b>-1.54343300</b> | <b>-0.89098700 0.37213700</b> |

|          |             |             |             |          |             |             |             |
|----------|-------------|-------------|-------------|----------|-------------|-------------|-------------|
| C        | 2.02600000  | -0.97351300 | -0.04972200 | C        | -1.99075600 | -2.24419600 | 0.08954700  |
| H        | 2.21312600  | -1.10703600 | 1.02355100  | H        | -2.84261200 | -2.53945400 | 0.71116200  |
| H        | 2.95512900  | -0.65067400 | -0.51282900 | H        | -1.17834400 | -2.94178000 | 0.27302400  |
| H        | 1.75690900  | -1.94029800 | -0.46728800 | H        | -2.28307700 | -2.32481900 | -0.95340800 |
| C        | 1.37127500  | 1.30307000  | 0.15733200  | C        | -1.05946900 | -0.79382600 | 1.73951600  |
| H        | 2.31932200  | 1.58708000  | -0.29218600 | H        | -0.26819500 | -1.52152200 | 1.89476500  |
| H        | 1.49065100  | 1.33337000  | 1.24820000  | H        | -1.85279800 | -0.98729800 | 2.46965800  |
| H        | 0.63638800  | 2.05146100  | -0.12199900 | H        | -0.65105000 | 0.19209000  | 1.93304200  |
| C        | -0.28587900 | -0.44737000 | 0.22990300  | C        | -2.59892300 | 0.07136700  | 0.08575000  |
| C        | -1.47204300 | 0.32111300  | -0.31720100 | C        | -2.09605800 | 1.49938300  | 0.00657000  |
| H        | -0.29532600 | -0.39051500 | 1.32639000  | H        | -3.40572900 | 0.00850100  | 0.82429800  |
| H        | -0.42763600 | -1.49245400 | -0.03546500 | H        | -3.02667000 | -0.17777300 | -0.88194000 |
| H        | -1.44742500 | 0.28951600  | -1.40773200 | H        | -1.27165100 | 1.55088600  | -0.70553900 |
| H        | -1.43952800 | 1.36717300  | -0.01433500 | H        | -1.72561400 | 1.84290800  | 0.97187100  |
| O        | -2.63464600 | -0.30203300 | 0.18765400  | O        | -3.18734400 | 2.29094600  | -0.41320900 |
| H        | -3.39449500 | 0.20319100  | -0.10713600 | O        | 0.39907300  | -0.50231900 | -1.68402800 |
|          |             |             |             | C        | 1.69643100  | -0.80013300 | -1.23469400 |
|          |             |             |             | H        | 1.71645600  | -1.75932500 | -0.70886100 |
|          |             |             |             | H        | 2.31838000  | -0.91588700 | -2.12145100 |
|          |             |             |             | H        | -0.21798400 | -0.60617000 | -0.93548300 |
|          |             |             |             | H        | -2.90142400 | 3.20621700  | -0.42983100 |
|          |             |             |             | C        | 2.28235400  | 0.28198700  | -0.34296700 |
|          |             |             |             | H        | 1.64396800  | 0.40326300  | 0.53391300  |
|          |             |             |             | H        | 2.25424800  | 1.22871200  | -0.88374300 |
|          |             |             |             | C        | 3.70767200  | -0.01937700 | 0.10157700  |
|          |             |             |             | H        | 4.34041100  | -0.14345600 | -0.77814300 |
|          |             |             |             | H        | 3.72761500  | -0.97396500 | 0.62891600  |
|          |             |             |             | C        | 4.29294600  | 1.06353900  | 0.99604900  |
|          |             |             |             | H        | 3.70100100  | 1.18698300  | 1.90180500  |
|          |             |             |             | H        | 5.31095000  | 0.82270100  | 1.29630500  |
|          |             |             |             | H        | 4.31713000  | 2.02461400  | 0.48448100  |
| DMEA-RC2 |             |             |             | DMEA-TS1 |             |             |             |
| N        | 1.27623500  | 2.30394600  | 0.80649200  | O        | 0.92628100  | -0.59321000 | -1.29183700 |
| C        | 1.34091000  | 2.11250600  | 2.24560500  | C        | -0.65890800 | -1.31349400 | -0.73151700 |
| H        | 1.36544400  | 3.06245100  | 2.78956400  | C        | 2.09500000  | -1.40167200 | -1.20288700 |
| H        | 2.23592100  | 1.55168700  | 2.49951400  | H        | 1.79964800  | -2.38520700 | -1.55003100 |
| H        | 0.47519900  | 1.54815100  | 2.58025700  | C        | -5.40041100 | -0.40624600 | 0.55850200  |
| C        | 2.46862300  | 2.98769900  | 0.33185400  | C        | -4.67660700 | -1.58862100 | 0.51423700  |
| H        | 3.34931200  | 2.43367900  | 0.64312500  | C        | -4.77280800 | 0.78346600  | 0.21652400  |
| H        | 2.54454200  | 4.00507300  | 0.73048000  | C        | -3.44187900 | 0.78876300  | -0.16411100 |
| H        | 2.47322600  | 3.04319100  | -0.75151400 | C        | -2.70863300 | -0.39679600 | -0.21202500 |
| C        | 0.05085000  | 3.00214700  | 0.44098200  | C        | -3.34367900 | -1.59165300 | 0.13353300  |
| C        | -0.20979300 | 3.00765500  | -1.05248300 | H        | -2.79840900 | -2.51954600 | 0.10481500  |
| H        | 0.05455600  | 4.03195700  | 0.81503100  | H        | -5.15034400 | -2.52126700 | 0.77763400  |
| H        | -0.77929200 | 2.48757000  | 0.91814600  | H        | -5.32046300 | 1.71221900  | 0.24501100  |
| H        | -0.11081900 | 1.99438900  | -1.44121100 | H        | -2.95225300 | 1.71084900  | -0.43251500 |
| H        | 0.50475700  | 3.64054800  | -1.57653400 | N        | -1.36395800 | -0.28937500 | -0.60843600 |
| O        | -1.52255400 | 3.50124600  | -1.23527100 | O        | -0.48165000 | -2.48076100 | -0.69683400 |
| O        | 0.92522200  | -0.30313500 | -0.28162700 | H        | 1.09728100  | 0.36159700  | -1.02052600 |
| C        | -0.68109800 | -3.06929800 | 0.18697400  | H        | 2.82514700  | -1.00348300 | -1.90370200 |
| C        | 2.06718900  | -0.72303200 | -0.99036700 | H        | -6.43673400 | -0.41177900 | 0.85516600  |
| H        | 1.76386400  | -1.57203600 | -1.59841900 | N        | 1.52271400  | 2.00845000  | -0.81434700 |
| C        | -4.62624800 | 0.28566800  | -0.13259700 | C        | 0.45691300  | 2.77516900  | -1.44988800 |
| C        | -3.29156400 | 0.53317700  | -0.42573800 | C        | 2.75665800  | 2.16030500  | -1.57657100 |
| C        | -5.01203500 | -0.97042800 | 0.31182000  | C        | 1.73720300  | 2.40582600  | 0.57516500  |
| C        | -4.07289000 | -1.97776600 | 0.46511400  | H        | -0.48274600 | 2.62667300  | -0.93176800 |
| C        | -2.74018800 | -1.72259900 | 0.16842500  | H        | 0.68558800  | 3.84422300  | -1.46360300 |
| C        | -2.34299100 | -0.46603900 | -0.27829600 | H        | 3.54038400  | 1.55309000  | -1.13433800 |
| H        | -1.30150200 | -0.28828700 | -0.49453200 | H        | 3.09417500  | 3.19990500  | -1.59922700 |
| H        | -2.97852100 | 1.50917900  | -0.76309300 | H        | 1.88023300  | 3.48792200  | 0.64926400  |
| H        | -6.04614500 | -1.17028000 | 0.54167600  | H        | 2.59452200  | 1.83020900  | -2.59843300 |
| H        | -4.36083000 | -2.95686800 | 0.81017400  | H        | 0.33426500  | 2.43472900  | -2.47369700 |
| N        | -1.82118300 | -2.75657700 | 0.33153500  | H        | 2.65221100  | 1.93328200  | 0.92126600  |
| O        | 0.39245100  | -3.51859100 | 0.09295200  | C        | 0.62156900  | 1.98376600  | 1.51007200  |
| H        | 1.10203700  | 0.57726400  | 0.10570900  | H        | 0.47129800  | 0.90626900  | 1.44238700  |
| H        | 2.40367500  | 0.05875300  | -1.67663700 | H        | -0.31903800 | 2.46690400  | 1.24959000  |
| H        | -5.35980100 | 1.06707100  | -0.24853500 | O        | 1.02949600  | 2.36119500  | 2.80791800  |
| H        | -1.68770000 | 3.56570800  | -2.17822000 | H        | 0.32397000  | 2.13698100  | 3.41761600  |
| C        | 3.20830700  | -1.13262700 | -0.07624200 | C        | 2.66336100  | -1.47601700 | 0.19942900  |
| H        | 3.49019900  | -0.28104800 | 0.54598000  | H        | 2.91684800  | -0.47252100 | 0.54195300  |
| H        | 2.84586000  | -1.90857300 | 0.59774400  | H        | 1.89567300  | -1.85882200 | 0.87122100  |

|         |             |             |             |             |             |             |             |
|---------|-------------|-------------|-------------|-------------|-------------|-------------|-------------|
| C       | 4.42876800  | -1.63312500 | -0.83797500 | C           | 3.89860900  | -2.36597400 | 0.26724300  |
| H       | 4.14068100  | -2.47977600 | -1.46238600 | H           | 4.65618700  | -1.98521000 | -0.41830400 |
| H       | 4.77455900  | -0.85491400 | -1.51959200 | H           | 3.64122800  | -3.36572500 | -0.08338300 |
| C       | 5.57145200  | -2.04630800 | 0.07784000  | C           | 4.48208700  | -2.45414600 | 1.66940400  |
| H       | 6.42876100  | -2.39960000 | -0.49196000 | H           | 3.75611200  | -2.86096500 | 2.37159200  |
| H       | 5.90365400  | -1.21083500 | 0.69235700  | H           | 5.36061300  | -3.09578300 | 1.69143500  |
| H       | 5.26628900  | -2.84797900 | 0.74874800  | H           | 4.77946300  | -1.47191200 | 2.03342200  |
| DMEA-IM |             |             |             | DMEA-TS2    |             |             |             |
| N       | -0.18985000 | 1.94383700  | 1.02514000  | O           | 1.28261800  | -0.79969200 | 0.00988000  |
| C       | -1.25089100 | 2.26555400  | 2.00323200  | C           | 0.06101800  | -1.35996200 | -0.19299600 |
| H       | -1.02571800 | 3.21494500  | 2.47589100  | C           | 2.40551000  | -1.64152100 | -0.21292300 |
| H       | -1.28220000 | 1.47924300  | 2.74741200  | H           | 2.34198700  | -2.51270100 | 0.43404800  |
| H       | -2.20108500 | 2.32148700  | 1.48914400  | C           | -5.00938800 | -1.33972000 | -0.25102100 |
| C       | 1.11307400  | 1.82544500  | 1.71324600  | C           | -4.12318100 | -2.32380200 | 0.16449300  |
| H       | 1.01480100  | 1.09038300  | 2.50197600  | C           | -4.50894200 | -0.08910000 | -0.58296300 |
| H       | 1.37720300  | 2.78911300  | 2.13456500  | C           | -3.15000400 | 0.16758000  | -0.50409700 |
| H       | 1.86725600  | 1.49619000  | 1.01572000  | C           | -2.24473500 | -0.81393700 | -0.08349400 |
| C       | -0.17857300 | 2.93744300  | -0.07554600 | C           | -2.76345000 | -2.07164900 | 0.25191900  |
| C       | 0.76852000  | 2.57419100  | -1.20225000 | H           | -2.09319900 | -2.84748600 | 0.57293500  |
| H       | 0.07189500  | 3.90644100  | 0.34491100  | H           | -4.49313000 | -3.30230300 | 0.43048500  |
| H       | -1.18680600 | 2.98026700  | -0.47240900 | H           | -5.17672000 | 0.69155200  | -0.91330000 |
| H       | 0.59102100  | 1.54725300  | -1.51924400 | H           | -2.77000700 | 1.13850100  | -0.78078000 |
| H       | 1.80677800  | 2.65783000  | -0.88664000 | N           | -0.90046300 | -0.45918700 | 0.03147000  |
| O       | 0.48545000  | 3.49076600  | -2.23440000 | O           | -0.03200700 | -2.52373800 | -0.55116600 |
| O       | 1.24789400  | -0.84073200 | 0.00039800  | H           | -0.55347800 | 0.79138200  | 0.53986700  |
| C       | 0.01622300  | -1.40934400 | -0.17308000 | H           | 2.39797900  | -1.99476600 | -1.24091200 |
| C       | 2.36516400  | -1.69406500 | -0.18498900 | H           | -6.06612000 | -1.54391000 | -0.31553300 |
| H       | 2.30123800  | -2.53797900 | 0.49775300  | N           | -0.31033700 | 1.86210400  | 1.03088400  |
| H       | 2.35897100  | -2.09320000 | -1.19669300 | C           | -1.42343500 | 2.16189800  | 1.94657500  |
| C       | -5.06651000 | -1.29159400 | -0.19370300 | C           | 0.94339300  | 1.76584900  | 1.79542300  |
| C       | -4.18421500 | -2.32856600 | 0.07334400  | C           | -0.24728900 | 2.86727600  | -0.04905200 |
| C       | -4.54838800 | -0.02115300 | -0.40749800 | H           | -2.34702300 | 2.22064900  | 1.38481500  |
|         |             |             |             | H           | -1.24480100 | 3.10551600  | 2.45486600  |
|         |             |             |             | H           | 1.16848100  | 2.72525400  | 2.25395700  |
|         |             |             |             | H           | 1.75243900  | 1.46360900  | 1.14791000  |
|         |             |             |             | H           | -1.49794500 | 1.36498600  | 2.67794100  |
|         |             |             |             | H           | 0.81861400  | 1.01616100  | 2.56810600  |
|         |             |             |             | H           | -1.23494300 | 2.92369100  | -0.49433300 |
|         |             |             |             | H           | -0.01558300 | 3.83729800  | 0.38942100  |
|         |             |             |             | C           | 0.74768700  | 2.53105900  | -1.14956900 |
|         |             |             |             | H           | 1.77094400  | 2.53540700  | -0.78081600 |
|         |             |             |             | H           | 0.54007700  | 1.54427300  | -1.54897600 |
|         |             |             |             | O           | 0.59998100  | 3.44058700  | -2.21605500 |
|         |             |             |             | H           | 0.94198800  | 4.29152300  | -1.93194000 |
|         |             |             |             | C           | 3.65717300  | -0.84380200 | 0.07534400  |
|         |             |             |             | H           | 3.67483600  | 0.03658600  | -0.56702600 |
|         |             |             |             | H           | 3.62380600  | -0.48620800 | 1.10431900  |
|         |             |             |             | C           | 4.92225800  | -1.66438600 | -0.14265000 |
|         |             |             |             | H           | 4.89338500  | -2.54897900 | 0.49414500  |
|         |             |             |             | H           | 4.94495500  | -2.02671200 | -1.17070800 |
|         |             |             |             | C           | 6.19032800  | -0.87458500 | 0.14448900  |
|         |             |             |             | H           | 6.21078600  | -0.52592700 | 1.17591600  |
|         |             |             |             | H           | 7.07872800  | -1.48151400 | -0.01783400 |
|         |             |             |             | H           | 6.26316400  | -0.00075100 | -0.50119100 |
| NEM-PC  |             |             |             |             |             |             |             |
|         | N           | -0.22023700 | 2.07431600  | 1.01886200  |             |             |             |
|         | C           | -1.04634100 | 2.16907500  | 2.21020100  |             |             |             |
|         | H           | -0.90580400 | 3.11814600  | 2.73915400  |             |             |             |
|         | H           | -0.79546400 | 1.36082700  | 2.89177100  |             |             |             |
|         | H           | -2.09487300 | 2.07894900  | 1.94331800  |             |             |             |
|         | C           | 1.18494900  | 2.13727000  | 1.38636800  |             |             |             |
|         | H           | 1.40450300  | 1.35197200  | 2.10300500  |             |             |             |
|         | H           | 1.44536200  | 3.10048500  | 1.83947400  |             |             |             |
|         | H           | 1.81692600  | 1.98199000  | 0.52007900  |             |             |             |
|         | C           | -0.58509900 | 3.10761800  | 0.06074400  |             |             |             |
|         | C           | 0.01362500  | 2.88904100  | -1.31456000 |             |             |             |
|         | H           | -0.30456400 | 4.10359700  | 0.42255400  |             |             |             |
|         | H           | -1.66655400 | 3.09899700  | -0.04908800 |             |             |             |
|         | H           | -0.21929000 | 1.87943300  | -1.65714000 |             |             |             |
|         | H           | 1.09788000  | 2.99105300  | -1.29513800 |             |             |             |
|         | O           | -0.55755100 | 3.86169800  | -2.16398300 |             |             |             |

|           |             |             |             |
|-----------|-------------|-------------|-------------|
| O         | 1.38824600  | -0.92310600 | 0.00584700  |
| C         | 0.23565000  | -1.58245200 | -0.14228700 |
| C         | 2.58089000  | -1.68201800 | -0.21217700 |
| H         | 2.60135900  | -2.51653300 | 0.48243100  |
| H         | 2.56590900  | -2.08329400 | -1.22109400 |
| C         | -4.91501400 | -1.57838800 | -0.14812400 |
| C         | -4.01167300 | -2.62295200 | -0.03068200 |
| C         | -4.43472700 | -0.27754100 | -0.19201800 |
| C         | -3.07517300 | -0.02824200 | -0.12484900 |
| C         | -2.16574200 | -1.07946100 | -0.00281000 |
| C         | -2.64713000 | -2.38700900 | 0.04681700  |
| H         | -1.96038700 | -3.20600000 | 0.13949200  |
| H         | -4.36682400 | -3.64070800 | 0.00789000  |
| H         | -5.11853000 | 0.55110500  | -0.28583500 |
| H         | -2.71019600 | 0.98453000  | -0.17367200 |
| N         | -0.80688300 | -0.75028100 | 0.09242700  |
| O         | 0.17262200  | -2.75236500 | -0.44610000 |
| H         | -0.57774300 | 0.21986300  | 0.31802900  |
| H         | -5.97356200 | -1.77341700 | -0.20509900 |
| H         | -0.14463500 | 3.78319900  | -3.02597500 |
| C         | 3.76138200  | -0.76338600 | -0.00366300 |
| H         | 3.68617300  | 0.07650000  | -0.69359900 |
| H         | 3.72183900  | -0.35391200 | 1.00503400  |
| C         | 5.08519800  | -1.48791600 | -0.21510900 |
| H         | 5.14673500  | -2.33468000 | 0.46875600  |
| H         | 5.11290500  | -1.90307100 | -1.22273400 |
| C         | 6.28744600  | -0.57945100 | -0.00729400 |
| H         | 7.21976300  | -1.11830800 | -0.16294800 |
| H         | 6.26977100  | 0.26020700  | -0.70032400 |
| H         | 6.30315400  | -0.17410700 | 1.00319200  |
| DMEA-RC   |             |             |             |
| O         | 2.23468800  | 1.23992600  | -1.24078200 |
| C         | -0.35925300 | 2.28101600  | 0.14125600  |
| C         | 3.23549600  | 0.99404600  | -0.28162900 |
| H         | 4.14937300  | 1.46591900  | -0.63288500 |
| C         | -4.01345000 | -1.33635000 | -0.12591200 |
| C         | -4.13711000 | -0.02641900 | 0.31655600  |
| C         | -2.78232200 | -1.79903800 | -0.56622500 |
| C         | -1.67845400 | -0.96163600 | -0.56624200 |
| C         | -1.81022300 | 0.34765500  | -0.12296900 |
| C         | -3.04141500 | 0.81991200  | 0.32090900  |
| H         | -3.13328000 | 1.83803200  | 0.66312200  |
| H         | -5.09025600 | 0.34128400  | 0.66063500  |
| H         | -2.67704900 | -2.81474700 | -0.91142400 |
| H         | -0.71617000 | -1.30884800 | -0.90353300 |
| N         | -0.67630300 | 1.16238500  | -0.13980700 |
| O         | 0.05782400  | 3.34074200  | 0.38392700  |
| H         | 2.97905300  | 1.45881600  | 0.67217000  |
| H         | -4.87032100 | -1.99006600 | -0.12710900 |
| C         | 3.47036600  | -0.49544000 | -0.11303300 |
| H         | 3.83271300  | -0.88777600 | -1.06005700 |
| H         | 4.25094800  | -0.66986800 | 0.63727800  |
| N         | 2.23470000  | -1.19391200 | 0.21251400  |
| C         | 2.32929700  | -2.60849800 | -0.08860300 |
| H         | 3.10259000  | -3.11510300 | 0.50150700  |
| H         | 1.37880300  | -3.09279400 | 0.12001500  |
| H         | 2.55982700  | -2.74952200 | -1.14103100 |
| C         | 1.83548300  | -0.99498500 | 1.59254800  |
| H         | 0.88455200  | -1.48948100 | 1.77130100  |
| H         | 2.56956400  | -1.39928400 | 2.30014900  |
| H         | 1.70553500  | 0.06079600  | 1.80811500  |
| H         | 1.53475000  | 0.60640200  | -1.05230900 |
| DMEA-IVM* |             |             |             |
| O         | 1.71874800  | 1.47933500  | 0.72416000  |
| C         | 0.38151200  | 1.49771200  | 0.30123700  |
| C         | 2.67099500  | 1.36443400  | -0.30581600 |
| H         | 2.57286700  | 2.16765400  | -1.03331100 |
| C         | -4.19510300 | -0.69296300 | -0.18854000 |
| C         | -3.78447000 | 0.61693800  | -0.38351400 |
| C         | -3.25778700 | -1.62584700 | 0.23814700  |
| C         | -1.94635500 | -1.25015400 | 0.46144800  |
| DMEA-TS1* |             |             |             |
| O         | -1.46177000 | -0.83611100 | -0.69007100 |
| C         | -0.01411500 | -1.08592700 | -0.26544500 |
| C         | -2.52753700 | -1.55645700 | -0.03301100 |
| H         | -2.76065200 | -2.44287700 | -0.60497800 |
| C         | 4.71067000  | 0.59418600  | 0.22332500  |
| C         | 4.16928300  | -0.66995600 | 0.40135900  |
| C         | 3.87483700  | 1.63164200  | -0.16939100 |
| C         | 2.52691300  | 1.40299800  | -0.37819300 |
| C         | 1.96613000  | 0.13224500  | -0.20117100 |
| C         | 2.81811400  | -0.90704100 | 0.19555100  |
| H         | 2.41831900  | -1.89402600 | 0.34051100  |
| H         | 4.80391500  | -1.48826700 | 0.70549200  |
| H         | 4.27418800  | 2.62352800  | -0.31411400 |
| H         | 1.87690300  | 2.20722700  | -0.68456600 |
| N         | 0.59795000  | 0.02592400  | -0.44825700 |
| O         | 0.16626800  | -2.21871600 | 0.10969400  |
| H         | -2.19823900 | -1.83162300 | 0.96006300  |
| H         | 5.76205100  | 0.76852800  | 0.38673300  |
| C         | -3.67147100 | -0.53714500 | -0.03113200 |
| H         | -4.18950000 | -0.57196700 | -0.98251400 |
| H         | -4.38224100 | -0.75604200 | 0.76140900  |
| N         | -3.05241500 | 0.78517200  | 0.10629400  |
| C         | -3.76262500 | 1.83795100  | -0.60686400 |
| H         | -4.75547900 | 2.00762300  | -0.18796300 |
| H         | -3.19301800 | 2.75903400  | -0.53726700 |
| H         | -3.86158300 | 1.56681700  | -1.65256000 |
| C         | -2.80167300 | 1.14596200  | 1.49812700  |
| H         | -2.21209600 | 2.05610700  | 1.53082000  |
| H         | -3.73510800 | 1.30654400  | 2.03888900  |
| H         | -2.24353000 | 0.35761900  | 1.99302500  |
| H         | -1.78981800 | 0.16196800  | -0.51515200 |
| DMEA-TS2* |             |             |             |
| O         | -1.83772200 | 1.58786600  | -0.53819000 |
| C         | -0.47509800 | 1.61497300  | -0.27724200 |
| C         | -2.73316600 | 1.20624200  | 0.49087800  |
| H         | -2.70913500 | 1.92595700  | 1.30717300  |
| C         | 4.08302300  | -0.68250900 | 0.14263500  |
| C         | 3.70503200  | 0.63664500  | 0.33856700  |
| C         | 3.11179400  | -1.60698000 | -0.21919600 |
| C         | 1.79522200  | -1.21539200 | -0.37785900 |

|         |             |             |             |             |             |             |             |
|---------|-------------|-------------|-------------|-------------|-------------|-------------|-------------|
| C       | -1.51016200 | 0.07047500  | 0.26422000  | C           | 1.39882700  | 0.11449600  | -0.17789500 |
| C       | -2.46952400 | 1.00246500  | -0.16555700 | C           | 2.38677700  | 1.04047100  | 0.18285100  |
| H       | -2.17013400 | 2.02000400  | -0.32931000 | H           | 2.11253500  | 2.06632800  | 0.33641700  |
| H       | -4.49690600 | 1.35817000  | -0.71357500 | H           | 4.44497500  | 1.37088300  | 0.61863700  |
| H       | -3.55052800 | -2.65211600 | 0.39976000  | H           | 3.38014800  | -2.63942800 | -0.38158100 |
| H       | -1.22554300 | -1.97857800 | 0.80000000  | H           | 1.05005000  | -1.93955600 | -0.66762400 |
| N       | -0.17143900 | 0.31974900  | 0.53248500  | N           | 0.04690300  | 0.39245900  | -0.35502400 |
| O       | -0.04200700 | 2.53543200  | -0.18595400 | O           | 0.05001800  | 2.69482500  | -0.08531900 |
| H       | 3.64093500  | 1.45610000  | 0.16902500  | H           | -3.71436400 | 1.25376600  | 0.03371900  |
| H       | -5.21938400 | -0.98134400 | -0.36292500 | H           | 5.11062000  | -0.98460500 | 0.26584300  |
| C       | 2.54184500  | 0.03141100  | -1.03353600 | C           | -2.47405800 | -0.18281600 | 1.06355400  |
| H       | 1.74965700  | 0.07094000  | -1.77221400 | H           | -1.71700700 | -0.13761700 | 1.83900300  |
| H       | 3.46859100  | -0.23617600 | -1.52983700 | H           | -3.38917300 | -0.57054500 | 1.50475900  |
| N       | 2.16974400  | -1.06573100 | -0.09656000 | N           | -1.96284600 | -1.12177300 | 0.04580200  |
| C       | 1.89501800  | -2.31705700 | -0.83400900 | C           | -1.61696200 | -2.41201400 | 0.65464800  |
| H       | 2.79906600  | -2.63970500 | -1.33685600 | H           | -2.50498600 | -2.88500200 | 1.06548600  |
| H       | 1.57227600  | -3.07178800 | -0.12806900 | H           | -1.18360000 | -3.05506800 | -0.10224800 |
| H       | 1.11164900  | -2.13024600 | -1.55766000 | H           | -0.89411300 | -2.25090900 | 1.44615800  |
| C       | 3.15935800  | -1.28323100 | 0.97905800  | C           | -2.86286400 | -1.29948300 | -1.09984700 |
| H       | 2.81127500  | -2.09713900 | 1.60275500  | H           | -2.40473600 | -1.99457300 | -1.79406500 |
| H       | 4.11431900  | -1.53840200 | 0.53447800  | H           | -3.81931700 | -1.69698100 | -0.76996700 |
| H       | 3.24411200  | -0.38395700 | 1.57210100  | H           | -3.00941200 | -0.35018500 | -1.59763900 |
| H       | 1.26372600  | -0.74477900 | 0.32968800  | H           | -0.95042100 | -0.55058800 | -0.27800800 |
| DMEA-P* |             |             |             |             |             |             |             |
|         | O           | -1.18494700 | 0.26369300  | -1.16840300 |             |             |             |
|         | C           | -0.08900600 | 0.66529400  | -0.52268000 |             |             |             |
|         | C           | -2.36698100 | 1.04992600  | -1.00394400 |             |             |             |
|         | H           | -2.10847300 | 2.10199300  | -1.03518900 |             |             |             |
|         | C           | 4.87475000  | -0.29767300 | 0.61191900  |             |             |             |
|         | C           | 4.04585700  | 0.74777000  | 0.98579700  |             |             |             |
|         | C           | 4.36890300  | -1.29680900 | -0.20784700 |             |             |             |
|         | C           | 3.05743400  | -1.24882800 | -0.64374100 |             |             |             |
|         | C           | 2.22493600  | -0.19535700 | -0.26496800 |             |             |             |
|         | C           | 2.72787400  | 0.81059400  | 0.55709600  |             |             |             |
|         | H           | 2.09640000  | 1.62535200  | 0.85385100  |             |             |             |
|         | H           | 4.42265200  | 1.53287300  | 1.62212600  |             |             |             |
|         | H           | 4.99553300  | -2.12016100 | -0.51140200 |             |             |             |
|         | H           | 2.66946600  | -2.02869300 | -1.28066600 |             |             |             |
|         | N           | 0.91108000  | -0.22260900 | -0.74714700 |             |             |             |
|         | O           | -0.01882600 | 1.67093200  | 0.14470500  |             |             |             |
|         | H           | -2.96901500 | 0.81684300  | -1.87267200 |             |             |             |
|         | H           | 5.89670100  | -0.33465400 | 0.95220600  |             |             |             |
|         | C           | -3.08848200 | 0.74700300  | 0.29196900  |             |             |             |
|         | H           | -2.43774000 | 1.02392700  | 1.11599900  |             |             |             |
|         | H           | -3.96311400 | 1.41128600  | 0.33631100  |             |             |             |
|         | N           | -3.45810000 | -0.64545100 | 0.45938900  |             |             |             |
|         | C           | -3.87099900 | -0.90213800 | 1.82321800  |             |             |             |
|         | H           | -4.76661500 | -0.33686700 | 2.11222700  |             |             |             |
|         | H           | -4.08925100 | -1.95982100 | 1.94784700  |             |             |             |
|         | H           | -3.07062100 | -0.63771700 | 2.50958200  |             |             |             |
|         | C           | -4.48557500 | -1.06618500 | -0.46991700 |             |             |             |
|         | H           | -4.72067000 | -2.11350400 | -0.29946000 |             |             |             |
|         | H           | -5.41339700 | -0.48867400 | -0.36470100 |             |             |             |
|         | H           | -4.14279800 | -0.96948700 | -1.49554300 |             |             |             |
|         | H           | 0.66800100  | -1.00486400 | -1.32803700 |             |             |             |
